# Supplementary material
Source: ML conference proceedings conference paper supplement (https://openaccess.thecvf.com/content/CVPR2023/html/Chen_Masked_Image_Training_CVPR_2023_paper.html)
Supplement: Supplementary file 1 [file Chen_Masked_Image_Training_CVPR_2023_supplemental.pdf]

# Supplementary Material for: Masked Image Training for Generalizable Deep Image Denoising

## Appendix

### A. Details of the Test Noise

We evaluate the generalization performance of the models on six different synthetic noise types to evaluate the generalization performance on the noise out of the training set: (1) **Speckle noise** is a kind of noise that can occur during the acquisition of medical images or tomography images. We use different variances  $\sigma^2$  to obtain different levels of noise. The *imnoise* function in MATLAB is used for generating Speckle noise. We add multiplicative noise according to the equation  $J = I + n * I$ , where  $n$  is uniformly distributed random noise with mean 0 and variance  $\sigma^2$ ,  $J$  is the noisy image.

(2) **Poisson noise** is a kind of signal-dependent noise that occurs during the acquisition of digital images. We amplified the noise using different scaling factor  $\alpha$  using the equation  $J = I + n * \alpha$ , where we generate Poisson noise  $n$  first, then multiply it by a scaling factor  $\alpha$ .

(3) **Spatially-correlated noise** indicates additive Gaussian noise filtered with an average kernel of size  $3 \times 3$ . Different levels indicate different standard deviations  $\sigma$  for the used Gaussian noise. This is to synthesize the complex artifact after denoising using a flawed algorithm.

(4) **Salt & pepper noise**. Different noise levels represent different noise densities, denoted by  $d$ . The *imnoise* function in MATLAB is used for generating Salt & pepper noise. This noise can appear during image acquisition as a result of camera imaging pipeline errors.

(5) **Image signal processing (ISP) noise**. Modern digital cameras aim to produce visually pleasing and accurate images that match human perception. The raw sensor data captured by the camera cannot directly produce a usable image, and several post-processing stages are required to convert its linear intensities into the final image [3]. As the original raw image contains noise, the post-processed image exhibits more complex noise. Since there are no adequate real noisy and noise-free image pairs, many denoising algorithms perform poorly on real data due to the gap between synthetic and real noise. In our experiments, we use the default parameter settings of [3] to synthesize ISP noise on RGB images.

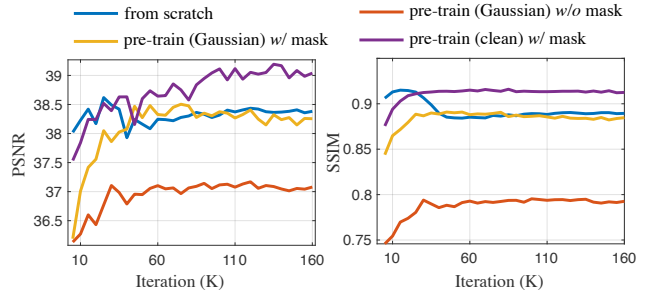

Figure 1. Training curve of different methods validated using our SIDD testset.

(6) **Mixture noise** is obtained by mixing the above different types of noise with different levels. We consider the real-world case where the image suffers from multiple degradations. The order of noise adding is Gaussian noise (variances  $\sigma_g^2$ ), speckle noise (variances  $\sigma_{s1}^2$ ), Poisson noise (scale  $\alpha$ ), Salt & pepper noise (density  $d$ ), speckle noise (variances  $\sigma_{s2}^2$ ). Since speckle noise is a multiplicative noise, it will have different effects when used in different positions. It will be multiplied by the noise already existing in the image to obtain complex noise degradation. There are 4 levels:

1.  $\sigma_g^2 = 0.003, \sigma_{s1}^2 = 0.003, \alpha = 1, d = 0.002, \sigma_{s2}^2 = 0.003$ ;
2.  $\sigma_g^2 = 0.004, \sigma_{s1}^2 = 0.004, \alpha = 1, d = 0.002, \sigma_{s2}^2 = 0.004$ ;
3.  $\sigma_g^2 = 0.006, \sigma_{s1}^2 = 0.006, \alpha = 1, d = 0.003, \sigma_{s2}^2 = 0.006$ ;
4.  $\sigma_g^2 = 0.008, \sigma_{s1}^2 = 0.008, \alpha = 1, d = 0.004, \sigma_{s2}^2 = 0.008$ ;

The noise patterns produced by these four settings are completely different from existing studies.

We also include two real noise types in this work: the Smartphone Image Denoising Dataset (SIDD) [1] and Monte Carlo (MC) rendered image noise [5].

| ID | Pre-train | SIDD<br>Fine-tune | Masked<br>Training | PSNR         | SSIM          | LPIPS         |
|----|-----------|-------------------|--------------------|--------------|---------------|---------------|
| 1  | Gaus. 15  |                   |                    | 32.11        | 0.6606        | 0.5434        |
| 2  | Gaus. 15  |                   | ✓                  | 33.01        | 0.6999        | 0.4626        |
| 3  | None      | ✓                 |                    | 38.36        | 0.8879        | 0.3555        |
| 4  | Gaus. 15  | ✓                 |                    | 37.08        | 0.7920        | 0.3622        |
| 5  | Gaus. 15  | ✓                 | ✓                  | 38.15        | 0.8822        | 0.3237        |
| 6  | Clean     | ✓                 | ✓                  | <b>39.11</b> | <b>0.9135</b> | <b>0.2614</b> |

Table 1. Masked pre-training for limited paired data. Our method of pre-training on clean images by masked training first and then fine-tuning on target limited dataset yields the best results.

## B. Additional Comparisons

**Methods for Comparison.** We compare our method with several classical methods: DnCNN [14], RIDNet [2], RNAN [16], SwinIR [10], Restormer [13], Dropout [8]. Among them, Dropout [8] was proposed to improve the generalization ability and relieve the overfitting problem. Following [8], we apply the dropout layer with a dropout probability of 0.7 before the output convolutional layer of the baseline model.

**Masked Training as Pre-training.** In many real-world scenarios, we can only access very limited image pairs for training. It is not enough to adequately train a denoising network because the network can easily overfit the training data. The performance of the network will be limited if it is trained only on limited data. The pre-training and fine-tuning paradigm may be helpful in this case. One approach is to train the network on the synthetic data first and then fine-tune it on the target data [14], but the performance may also be unsatisfactory because of the gap between the pre-train data and the target data. In this paragraph, we will introduce a practical approach that uses the masked training method for pre-training. We first pre-train the model on clean images with the masked training strategy, and then fine-tune the model on the limited real training samples with the mask. This allows the model to obtain generalization ability even when trained on extremely limited training data. Pre-training on clean images enables the network to learn the content representation of natural images and thus benefits the fine-tuning of target noise. To conduct such experiments, we use images from the SIDD dataset [1]. SIDD contains real noisy images with high-quality clean references. Due to different lighting and different cameras, the noise of the image is also different. It is consistent with the complex noise situation in the real world. In order to simulate a scenario with extremely limited training samples, the training set only contains two 4K noisy – clean image pairs from SIDD. We also selected one image from each of the ten scenes, for a total of ten images as a test set. Table 1 shows the experiment settings and results. For experiment 3, we directly train the model on the limited training sam-

ples. For experiment 4 and 5, we first pre-train the models using Gaussian noise with  $\sigma = 15$  and then fine-tune them on target noise. While for experiment 6, we pre-trained the model on clean (noise-free) images with the proposed masked training strategy, and then fine-tuned it on the target training samples. The model pre-trained on clean images using the proposed masked training achieves the best results. This demonstrates the potential of our approach as a new low-level pre-training method. In addition, our method pre-trained on noisy images is not as effective as pre-trained on clean images, which illustrates that our method benefits from learning information about the image’s distribution. Visual results are shown in Figure 2. Our method preserves the most texture detail. Figure 1 shows the training curves for different experiments. The numerical performance of the model pre-trained on Gaussian noise and fine-tuned without masking (red line) is generally low and does not increase with training. For the model trained from scratch directly on SIDD (blue line), its PSNR starts to fluctuate at the beginning of training and does not improve any further. Its SSIM even drops with training. This indicates a severe overfitting problem. In contrast, the method using the proposed masked training (purple and yellow lines) can continue to improve the performance during the training process. This indicates that the model has not yet had an overfitting problem. The method pre-trained with clean images (purple line) performs better.

**Quantitative Comparison.** In Figure 4, we present the complete test curves including the LPIPS results on different noise types and levels. Our method demonstrates a slower performance degradation compared to other models, indicating a better generalization ability, especially when dealing with more severe noise types. We provide full numerical results in Table 2, Table 4, Table 3, and Table 5, where we evaluate our method on four benchmark datasets, namely CBS68 [11], Kodak24 [6], McMaster [15], and Urban100 [7]. Our method outperforms other state-of-the-art models significantly across all noise types. Particularly, we obtain a significant lead in LPIPS performance, suggesting that our results have better human visual perceptual quality.

**Additional Visual Results.** Figure 5 shows more visual comparisons. The model’s performance without masked training is significantly limited over the various noise types. Our model still effectively removes noise when dealing with a variety of noise outside the training set.

## C. Additional Analyses of CKa

In the main text, in order to investigate how masked training differs from normal training strategy, we utilize

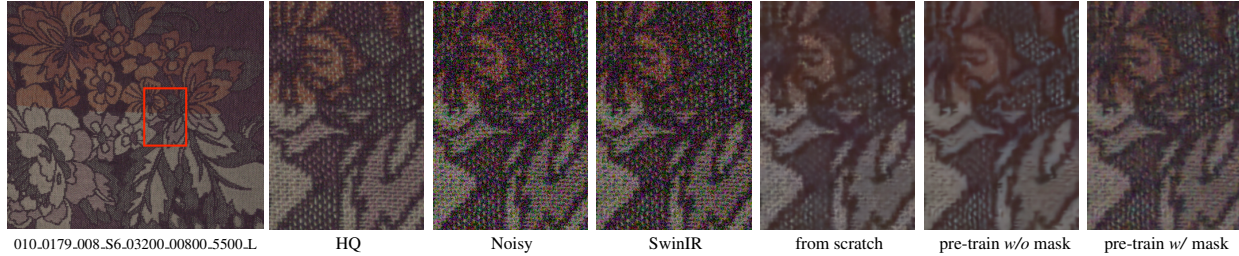

Figure 2. Visual comparison of different methods on real smartphone noise dataset SIDD [1]. “SwinIR” is trained on Gaussian noise,  $\sigma = 15$ . “from scratch” is trained directly on the target two SIDD training samples. “pre-train w/o mask” is pre-trained on Gaussian noise,  $\sigma = 15$ , and fine-tuned without mask. “pre-train w/ mask” is pre-trained on clean images and fine-tuned by masked training.

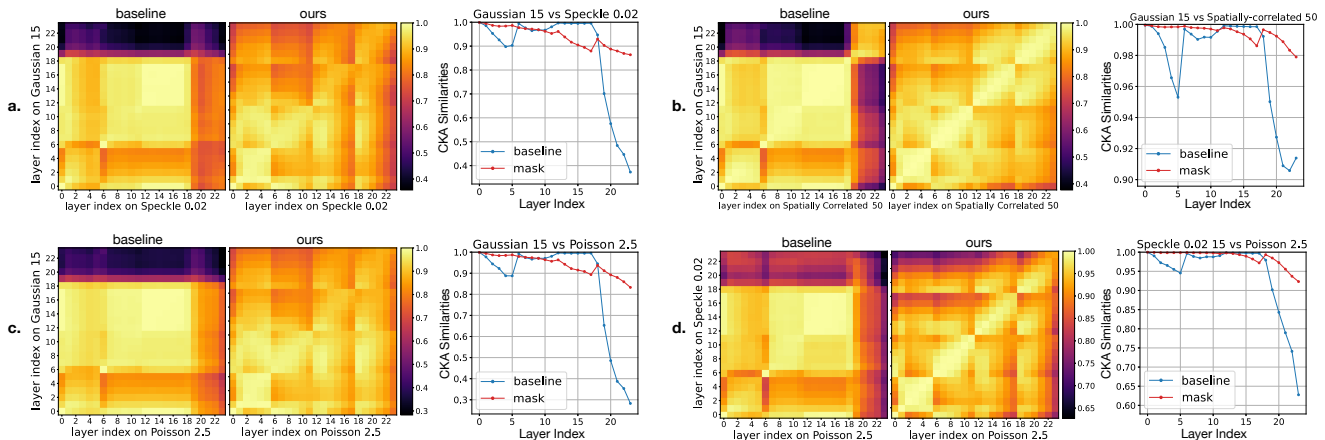

Figure 3. CKA similarity to analyze the representation similarity of network layers.

the centered kernel alignment (CKA) [4, 12] to analyze the differences between network representations obtained from those two training methods. In detail, we calculate the representations of two layers  $\mathbf{X} \in \mathbb{R}^{m \times p_1}$  and  $\mathbf{Y} \in \mathbb{R}^{m \times p_2}$  on the same  $m$  data points, with  $p_1$  and  $p_2$  neurons respectively. Gram matrices  $\mathbf{K} = \mathbf{X}\mathbf{X}^\top$  and  $\mathbf{L} = \mathbf{Y}\mathbf{Y}^\top$  are used to compute CKA:

$$\text{CKA}(\mathbf{K}, \mathbf{L}) = \frac{\text{HSIC}(\mathbf{K}, \mathbf{L})}{\sqrt{\text{HSIC}(\mathbf{K}, \mathbf{K})\text{HSIC}(\mathbf{L}, \mathbf{L})}}$$

where HSIC is the Hilbert-Schmidt independence criterion [9]. Given the centering matrix  $\mathbf{H} = \mathbf{I}_n - \frac{1}{n}\mathbf{1}\mathbf{1}^\top$ , and centered Gram matrices  $\mathbf{K}' = \mathbf{H}\mathbf{K}\mathbf{H}$  and  $\mathbf{L}' = \mathbf{H}\mathbf{L}\mathbf{H}$ , we have  $\text{HSIC}(\mathbf{K}, \mathbf{L}) = \text{vec}(\mathbf{K}') \cdot \text{vec}(\mathbf{L}') / (m - 1)^2$ . More CKA results are shown in Figure 3. We first compare the correlation of the features between different noise types. For the baseline model, the correlation between the features of Gaussian noise and other different noises at the deep level is relatively low (a, b, c). Besides, the feature correlation between the noise outside the training set is also low (d). The model using the proposed masked training is able to have a high correlation in all cases. Figure 3 (a) shows the cross-model comparison between baseline and masked training models. We find that a significant difference be-

tween the two is that the features of the deeper layers of the baseline model have low correlations with all layers of our model. This indicates that these two training methods have inconsistent learning patterns for features, especially for the deeper layers. To explore how the model performs on different noise, Figure 3 (b) shows the cross-noise comparison between in-distribution noise and out-of-distribution noise (Gaussian and Poisson noise). For the baseline model, there is a low correlation between the different noise in the deep layers. It shows that the network processes these two types of noise differently for the deep layers. The other types of noise share a similar phenomenon. We suggest that this is because the baseline approach makes the deep layer of the model focus on overfitting the patterns of the training set, which leads to the poor generalization of the deep layers to handle different noise. In our model, the correlation between adjacent layers in our model is high. The proposed masked training forces the network to learn the distribution of the images themselves, which is similar to different types of noise. This allows our method to have a stronger generalization capability.

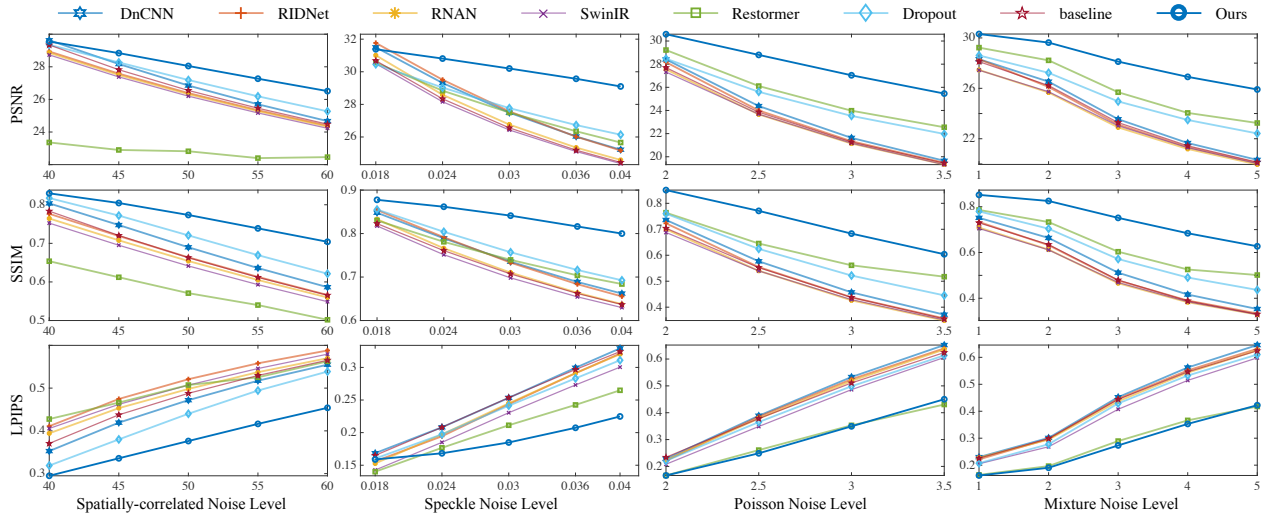

Figure 4. Performance comparisons on four noise types with different levels on the Kodak24 dataset [6]. All models are trained only on Gaussian noise. Our masked training approach demonstrates good generalization performance across different noise types.

## References

- [1] Abdelrahman Abdelhamed, Stephen Lin, and Michael S Brown. A high-quality denoising dataset for smartphone cameras. In *Proceedings of the IEEE Conference on Computer Vision and Pattern Recognition*, pages 1692–1700, 2018.
- [2] Saeed Anwar and Nick Barnes. Real image denoising with feature attention. In *Proceedings of the IEEE/CVF international conference on computer vision*, pages 3155–3164, 2019.
- [3] Tim Brooks, Ben Mildenhall, Tianfan Xue, Jiawen Chen, Dillon Sharlet, and Jonathan T Barron. Unprocessing images for learned raw denoising. In *Proceedings of the IEEE/CVF Conference on Computer Vision and Pattern Recognition*, pages 11036–11045, 2019.
- [4] Corinna Cortes, Mehryar Mohri, and Afshin Rostamizadeh. Algorithms for learning kernels based on centered alignment. *The Journal of Machine Learning Research*, 13:795–828, 2012.
- [5] Arthur Firmino, Jeppe Revall Frisvad, and Henrik Wann Jensen. Progressive denoising of monte carlo rendered images. In *Computer Graphics Forum*, volume 41, pages 1–11. Wiley Online Library, 2022.
- [6] Rich Franzen. Kodak lossless true color image suite. source: <http://r0k.us/graphics/kodak/>, 1999.
- [7] Jia-Bin Huang, Abhishek Singh, and Narendra Ahuja. Single image super-resolution from transformed self-exemplars. In *CVPR*, 2015.
- [8] Xiangtao Kong, Xina Liu, Jinjin Gu, Yu Qiao, and Chao Dong. Reflash dropout in image super-resolution. In *Proceedings of the IEEE/CVF Conference on Computer Vision and Pattern Recognition*, pages 6002–6012, 2022.
- [9] Simon Kornblith, Mohammad Norouzi, Honglak Lee, and Geoffrey Hinton. Similarity of neural network representations revisited. In *International Conference on Machine Learning*, pages 3519–3529. PMLR, 2019.
- [10] Jingyun Liang, Jiezhong Cao, Guolei Sun, Kai Zhang, Luc Van Gool, and Radu Timofte. Swinir: Image restoration using swin transformer. In *CVPR*, 2021.
- [11] David Martin, Charless Fowlkes, Doron Tal, and Jitendra Malik. A database of human segmented natural images and its application to evaluating segmentation algorithms and measuring ecological statistics. In *Proceedings Eighth IEEE International Conference on Computer Vision. ICCV 2001*, volume 2, pages 416–423. IEEE, 2001.
- [12] Maithra Raghu, Thomas Unterthiner, Simon Kornblith, Chiyuan Zhang, and Alexey Dosovitskiy. Do vision transformers see like convolutional neural networks? *Advances in Neural Information Processing Systems*, 34:12116–12128, 2021.
- [13] Syed Waqas Zamir, Aditya Arora, Salman Khan, Munawar Hayat, Fahad Shahbaz Khan, and Ming-Hsuan Yang. Restormer: Efficient transformer for high-resolution image restoration. In *Proceedings of the IEEE/CVF Conference on Computer Vision and Pattern Recognition*, pages 5728–5739, 2022.
- [14] Kai Zhang, Wangmeng Zuo, Yunjin Chen, Deyu Meng, and Lei Zhang. Beyond a gaussian denoiser: Residual learning of deep cnn for image denoising. *IEEE transactions on image processing*, 26(7):3142–3155, 2017.
- [15] Lei Zhang, Xiaolin Wu, Antoni Buades, and Xin Li. Color demosaicking by local directional interpolation and nonlocal adaptive thresholding. *Journal of Electronic imaging*, 20(2):023016, 2011.
- [16] Yulun Zhang, Kungpeng Li, Kai Li, Bineng Zhong, and Yun Fu. Residual non-local attention networks for image restoration. *arXiv preprint arXiv:1903.10082*, 2019.

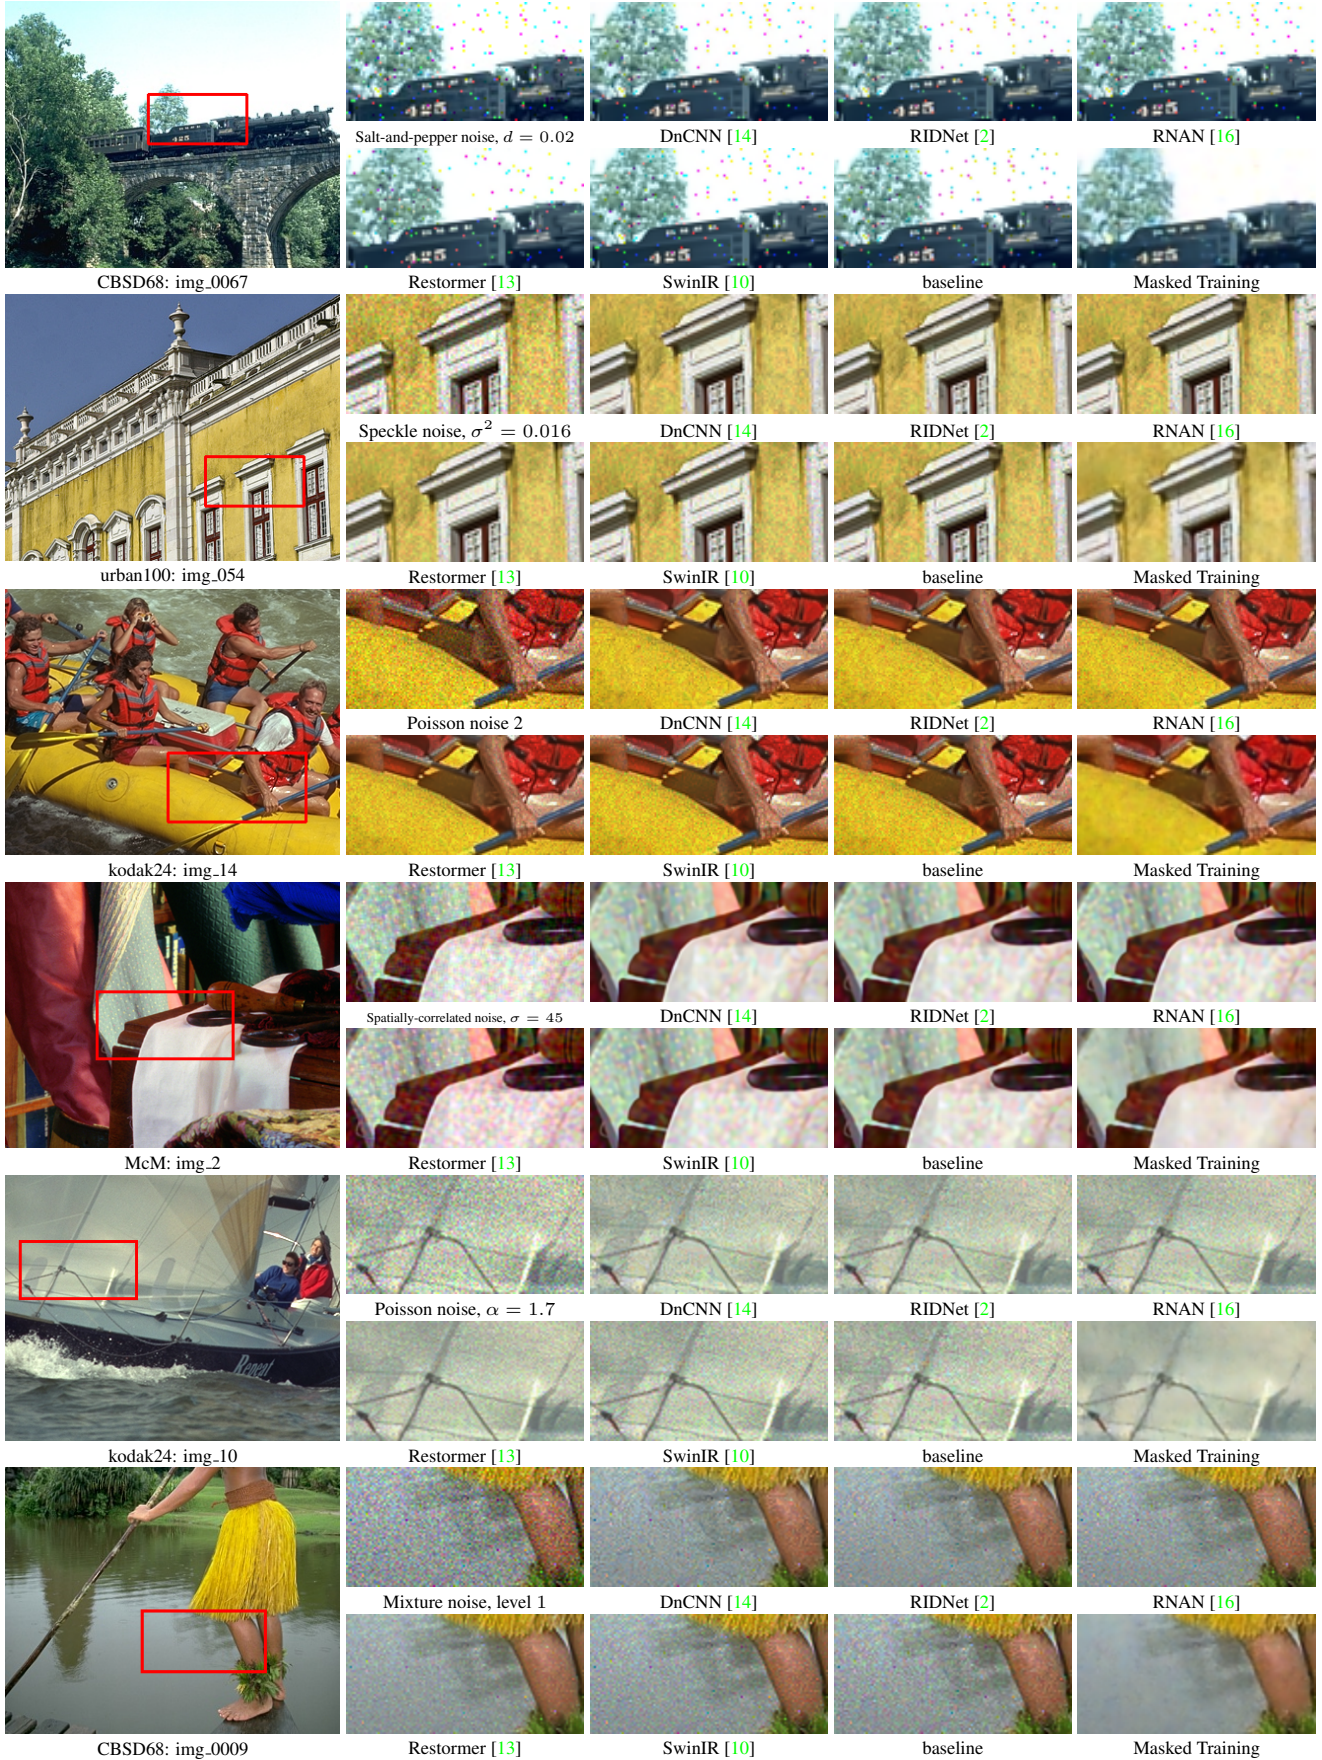

Figure 5. Visual comparison.

| Speckle noise        |              |               | $\sigma^2 = 0.02$ |              |               | $\sigma^2 = 0.024$ |              |               | $\sigma^2 = 0.03$ |              |               | $\sigma^2 = 0.04$ |  |  |
|----------------------|--------------|---------------|-------------------|--------------|---------------|--------------------|--------------|---------------|-------------------|--------------|---------------|-------------------|--|--|
| Method               | PSNR         | SSIM          | LPIPS             | PSNR         | SSIM          | LPIPS              | PSNR         | SSIM          | LPIPS             | PSNR         | SSIM          | LPIPS             |  |  |
| DnCNN [14]           | 30.74        | 0.8281        | 0.1806            | 29.31        | 0.7891        | 0.2082             | 27.49        | 0.7353        | 0.2533            | 25.22        | 0.6620        | 0.3292            |  |  |
| RIDNet [2]           | 31.01        | 0.8337        | 0.1665            | 29.51        | 0.7916        | 0.1944             | 27.57        | 0.7331        | 0.2436            | 25.17        | 0.6554        | 0.3212            |  |  |
| RNAN [16]            | 30.15        | 0.8101        | 0.1660            | 28.59        | 0.7662        | 0.1972             | 26.76        | 0.7101        | 0.2449            | 24.59        | 0.6377        | 0.3203            |  |  |
| SwinIR [10]          | 29.64        | 0.7939        | 0.1555            | 28.16        | 0.7514        | 0.1851             | 26.43        | 0.6981        | 0.2305            | 24.37        | 0.6298        | 0.3004            |  |  |
| Restormer [13]       | 29.95        | 0.8135        | 0.1521            | 28.84        | 0.7810        | 0.1767             | 27.50        | 0.7395        | 0.2113            | 25.66        | 0.6839        | 0.2649            |  |  |
| Dropout [8]          | 29.97        | 0.8382        | 0.1709            | 29.03        | 0.8041        | 0.1974             | 27.77        | 0.7570        | 0.2413            | 26.14        | 0.6925        | 0.3110            |  |  |
| baseline             | 29.84        | 0.8016        | 0.1778            | 28.34        | 0.7608        | 0.2082             | 26.56        | 0.7071        | 0.2536            | 24.44        | 0.6367        | 0.3242            |  |  |
| <b>Ours</b>          | <b>31.22</b> | <b>0.8739</b> | <b>0.1594</b>     | <b>30.81</b> | <b>0.8617</b> | <b>0.1683</b>      | <b>30.20</b> | <b>0.8412</b> | <b>0.1849</b>     | <b>29.10</b> | <b>0.8000</b> | <b>0.2248</b>     |  |  |
| Poisson noise        |              |               | $\alpha = 2$      |              |               | $\alpha = 2.5$     |              |               | $\alpha = 3$      |              |               | $\alpha = 3.5$    |  |  |
| Method               | PSNR         | SSIM          | LPIPS             | PSNR         | SSIM          | LPIPS              | PSNR         | SSIM          | LPIPS             | PSNR         | SSIM          | LPIPS             |  |  |
| DnCNN [14]           | 28.41        | 0.7359        | 0.2284            | 24.38        | 0.5767        | 0.3887             | 21.63        | 0.4571        | 0.5330            | 19.65        | 0.3711        | 0.6521            |  |  |
| RIDNet [2]           | 28.17        | 0.7231        | 0.2215            | 24.00        | 0.5546        | 0.3849             | 21.34        | 0.4379        | 0.5246            | 19.48        | 0.3567        | 0.6397            |  |  |
| RNAN [16]            | 27.55        | 0.7000        | 0.2231            | 23.66        | 0.5402        | 0.3783             | 21.14        | 0.4263        | 0.5184            | 19.33        | 0.3486        | 0.6355            |  |  |
| SwinIR [10]          | 27.32        | 0.6877        | 0.2081            | 23.68        | 0.5398        | 0.3487             | 21.17        | 0.4294        | 0.4860            | 19.32        | 0.3506        | 0.6059            |  |  |
| Restormer [13]       | 29.22        | 0.7639        | 0.1662            | 26.11        | 0.6452        | 0.2608             | 23.98        | 0.5613        | 0.3530            | 22.55        | 0.5174        | 0.4306            |  |  |
| Dropout [8]          | 28.47        | 0.7601        | 0.2209            | 25.61        | 0.6245        | 0.3652             | 23.53        | 0.5218        | 0.4986            | 21.97        | 0.4454        | 0.6136            |  |  |
| baseline             | 27.70        | 0.7040        | 0.2339            | 23.85        | 0.5524        | 0.3782             | 21.27        | 0.4377        | 0.5109            | 19.45        | 0.3550        | 0.6241            |  |  |
| <b>Ours</b>          | <b>30.59</b> | <b>0.8510</b> | <b>0.1662</b>     | <b>28.80</b> | <b>0.7709</b> | <b>0.2488</b>      | <b>27.04</b> | <b>0.6834</b> | <b>0.3493</b>     | <b>25.46</b> | <b>0.6039</b> | <b>0.4502</b>     |  |  |
| Spatially-correlated |              |               | $\sigma = 40$     |              |               | $\sigma = 45$      |              |               | $\sigma = 50$     |              |               | $\sigma = 55$     |  |  |
| Method               | PSNR         | SSIM          | LPIPS             | PSNR         | SSIM          | LPIPS              | PSNR         | SSIM          | LPIPS             | PSNR         | SSIM          | LPIPS             |  |  |
| DnCNN [14]           | 29.63        | 0.8036        | 0.3527            | 28.17        | 0.7474        | 0.4192             | 26.85        | 0.6898        | 0.4718            | 25.70        | 0.6360        | 0.5173            |  |  |
| RIDNet [2]           | 28.94        | 0.7766        | 0.4109            | 27.58        | 0.7189        | 0.4746             | 26.39        | 0.6637        | 0.5208            | 25.34        | 0.6131        | 0.5580            |  |  |
| RNAN [16]            | 28.86        | 0.7644        | 0.3943            | 27.50        | 0.7078        | 0.4532             | 26.32        | 0.6542        | 0.4980            | 25.28        | 0.6050        | 0.5373            |  |  |
| SwinIR [10]          | 28.73        | 0.7524        | 0.4056            | 27.38        | 0.6951        | 0.4620             | 26.20        | 0.6414        | 0.5070            | 25.17        | 0.5930        | 0.5458            |  |  |
| Restormer [13]       | 23.42        | 0.6533        | 0.4412            | 23.06        | 0.6109        | 0.4783             | 22.82        | 0.5709        | 0.5072            | 22.59        | 0.5353        | 0.5356            |  |  |
| Dropout [8]          | 29.35        | 0.8173        | 0.3188            | 28.27        | 0.7719        | 0.3800             | 27.19        | 0.7206        | 0.4400            | 26.19        | 0.6694        | 0.4943            |  |  |
| baseline             | 29.34        | 0.7834        | 0.3706            | 27.82        | 0.7205        | 0.4375             | 26.55        | 0.6628        | 0.4878            | 25.46        | 0.6118        | 0.5295            |  |  |
| <b>Ours</b>          | <b>29.55</b> | <b>0.8296</b> | <b>0.2949</b>     | <b>28.84</b> | <b>0.8045</b> | <b>0.3358</b>      | <b>28.05</b> | <b>0.7735</b> | <b>0.3762</b>     | <b>27.27</b> | <b>0.7388</b> | <b>0.4163</b>     |  |  |
| Salt & pepper        |              |               | $d = 0.002$       |              |               | $d = 0.004$        |              |               | $d = 0.008$       |              |               | $d = 0.012$       |  |  |
| Method               | PSNR         | SSIM          | LPIPS             | PSNR         | SSIM          | LPIPS              | PSNR         | SSIM          | LPIPS             | PSNR         | SSIM          | LPIPS             |  |  |
| DnCNN [14]           | 24.75        | 0.6785        | 0.3639            | 21.15        | 0.4952        | 0.5626             | 17.55        | 0.2993        | 0.8196            | 15.47        | 0.2066        | 0.9779            |  |  |
| RIDNet [2]           | 25.19        | 0.6769        | 0.3617            | 21.38        | 0.4934        | 0.5498             | 17.65        | 0.2969        | 0.8029            | 15.60        | 0.2066        | 0.9598            |  |  |
| RNAN [16]            | 23.59        | 0.6416        | 0.3829            | 20.42        | 0.4639        | 0.5599             | 17.21        | 0.2850        | 0.8048            | 15.31        | 0.2006        | 0.9644            |  |  |
| SwinIR [10]          | 23.42        | 0.6329        | 0.3873            | 20.21        | 0.4511        | 0.5710             | 17.00        | 0.2688        | 0.8103            | 15.14        | 0.1875        | 0.9614            |  |  |
| Restormer [13]       | 23.81        | 0.6384        | 0.3919            | 20.99        | 0.4831        | 0.5551             | 19.79        | 0.3878        | 0.6512            | 19.25        | 0.3257        | 0.7574            |  |  |
| Dropout [8]          | 27.44        | 0.7180        | 0.3041            | 24.36        | 0.5557        | 0.4898             | 21.01        | 0.3790        | 0.7415            | 19.03        | 0.2902        | 0.9047            |  |  |
| baseline             | 25.36        | 0.6510        | 0.3694            | 21.93        | 0.4747        | 0.5642             | 18.42        | 0.2939        | 0.8153            | 16.46        | 0.2106        | 0.9656            |  |  |
| <b>Ours</b>          | <b>30.52</b> | <b>0.8477</b> | <b>0.1768</b>     | <b>28.48</b> | <b>0.7681</b> | <b>0.2786</b>      | <b>25.01</b> | <b>0.5958</b> | <b>0.5039</b>     | <b>22.48</b> | <b>0.4622</b> | <b>0.6979</b>     |  |  |
| Mixture noise        |              |               | level 1           |              |               | level 2            |              |               | level 3           |              |               | level 4           |  |  |
| Method               | PSNR         | SSIM          | LPIPS             | PSNR         | SSIM          | LPIPS              | PSNR         | SSIM          | LPIPS             | PSNR         | SSIM          | LPIPS             |  |  |
| DnCNN [14]           | 28.31        | 0.7514        | 0.2299            | 26.53        | 0.6636        | 0.3011             | 23.55        | 0.5117        | 0.4522            | 21.66        | 0.4162        | 0.5622            |  |  |
| RIDNet [2]           | 28.13        | 0.7335        | 0.2215            | 26.11        | 0.6320        | 0.2971             | 23.13        | 0.4776        | 0.4461            | 21.34        | 0.3899        | 0.5514            |  |  |
| RNAN [16]            | 27.46        | 0.7090        | 0.2280            | 25.67        | 0.6126        | 0.2948             | 22.90        | 0.4657        | 0.4369            | 21.19        | 0.3826        | 0.5431            |  |  |
| SwinIR [10]          | 27.44        | 0.7049        | 0.2051            | 25.73        | 0.6113        | 0.2682             | 23.03        | 0.4689        | 0.4073            | 21.29        | 0.3847        | 0.5145            |  |  |
| Restormer [13]       | 29.23        | 0.7859        | 0.1639            | 28.22        | 0.7330        | 0.1965             | 25.69        | 0.6034        | 0.2894            | 24.05        | 0.5257        | 0.3662            |  |  |
| Dropout [8]          | 28.61        | 0.7797        | 0.2071            | 27.23        | 0.7039        | 0.2777             | 24.96        | 0.5715        | 0.4290            | 23.49        | 0.4906        | 0.5324            |  |  |
| baseline             | 28.12        | 0.7295        | 0.2259            | 26.22        | 0.6346        | 0.2985             | 23.28        | 0.4795        | 0.4441            | 21.44        | 0.3885        | 0.5463            |  |  |
| <b>Ours</b>          | <b>30.31</b> | <b>0.8518</b> | <b>0.1617</b>     | <b>29.63</b> | <b>0.8251</b> | <b>0.1903</b>      | <b>28.12</b> | <b>0.7513</b> | <b>0.2732</b>     | <b>26.91</b> | <b>0.6841</b> | <b>0.3530</b>     |  |  |

Table 2. Quantitative comparison on Kodak24 [6].

| Speckle noise        |              |               | $\sigma^2 = 0.02$ |              |               | $\sigma^2 = 0.024$ |              |               | $\sigma^2 = 0.03$ |              |               | $\sigma^2 = 0.04$ |  |  |
|----------------------|--------------|---------------|-------------------|--------------|---------------|--------------------|--------------|---------------|-------------------|--------------|---------------|-------------------|--|--|
| Method               | PSNR         | SSIM          | LPIPS             | PSNR         | SSIM          | LPIPS              | PSNR         | SSIM          | LPIPS             | PSNR         | SSIM          | LPIPS             |  |  |
| DnCNN [14]           | 30.67        | 0.8254        | 0.1506            | 29.24        | 0.7927        | 0.1840             | 27.54        | 0.7551        | 0.2269            | 25.49        | 0.7095        | 0.2856            |  |  |
| RIDNet [2]           | 30.77        | 0.8261        | 0.1444            | 29.31        | 0.7934        | 0.1757             | 27.58        | 0.7551        | 0.2168            | 25.49        | 0.7081        | 0.2750            |  |  |
| RNAN [16]            | 29.77        | 0.8066        | 0.1492            | 28.32        | 0.7745        | 0.1814             | 26.67        | 0.7377        | 0.2224            | 24.75        | 0.6932        | 0.2796            |  |  |
| SwinIR [10]          | 29.17        | 0.7947        | 0.1258            | 27.83        | 0.7660        | 0.1524             | 26.30        | 0.7322        | 0.1893            | 24.46        | 0.6909        | 0.2412            |  |  |
| Restormer [13]       | 28.89        | 0.8005        | 0.1300            | 27.95        | 0.7790        | 0.1515             | 26.81        | 0.7523        | 0.1807            | 25.30        | 0.7173        | 0.2213            |  |  |
| Dropout [8]          | 28.64        | 0.8153        | 0.1416            | 27.85        | 0.7852        | 0.1688             | 26.89        | 0.7501        | 0.2032            | 25.64        | 0.7062        | 0.2525            |  |  |
| baseline             | 28.86        | 0.7283        | 0.1353            | 27.61        | 0.7014        | 0.1593             | 26.15        | 0.6679        | 0.1938            | 24.38        | 0.6251        | 0.2437            |  |  |
| <b>Ours</b>          | <b>30.33</b> | <b>0.8157</b> | <b>0.1130</b>     | <b>30.01</b> | <b>0.8016</b> | <b>0.1238</b>      | <b>29.53</b> | <b>0.7800</b> | <b>0.1412</b>     | <b>28.66</b> | <b>0.7463</b> | <b>0.1761</b>     |  |  |
| Poisson noise        |              |               | $\alpha = 2$      |              |               | $\alpha = 2.5$     |              |               | $\alpha = 3$      |              |               | $\alpha = 3.5$    |  |  |
| Method               | PSNR         | SSIM          | LPIPS             | PSNR         | SSIM          | LPIPS              | PSNR         | SSIM          | LPIPS             | PSNR         | SSIM          | LPIPS             |  |  |
| DnCNN [14]           | 29.13        | 0.7771        | 0.1772            | 25.40        | 0.6740        | 0.2915             | 22.78        | 0.5910        | 0.3972            | 20.86        | 0.5261        | 0.4846            |  |  |
| RIDNet [2]           | 29.00        | 0.7706        | 0.1681            | 25.17        | 0.6636        | 0.2838             | 22.59        | 0.5836        | 0.3877            | 20.76        | 0.5227        | 0.4730            |  |  |
| RNAN [16]            | 28.13        | 0.7488        | 0.1760            | 24.58        | 0.6476        | 0.2897             | 22.18        | 0.5710        | 0.3916            | 20.44        | 0.5119        | 0.4765            |  |  |
| SwinIR [10]          | 27.85        | 0.7419        | 0.1468            | 24.48        | 0.6459        | 0.2472             | 22.12        | 0.5710        | 0.3419            | 20.35        | 0.5122        | 0.4229            |  |  |
| Restormer [13]       | 28.74        | 0.7765        | 0.1310            | 25.78        | 0.6936        | 0.2082             | 23.57        | 0.6296        | 0.2778            | 21.94        | 0.5792        | 0.3342            |  |  |
| Dropout [8]          | 27.74        | 0.7699        | 0.1649            | 25.56        | 0.6751        | 0.2645             | 23.84        | 0.5986        | 0.3558            | 22.47        | 0.5377        | 0.4355            |  |  |
| baseline             | 27.89        | 0.7024        | 0.1557            | 24.51        | 0.6025        | 0.2522             | 22.19        | 0.5361        | 0.3427            | 20.49        | 0.4761        | 0.4207            |  |  |
| <b>Ours</b>          | <b>30.01</b> | <b>0.8016</b> | <b>0.1120</b>     | <b>28.67</b> | <b>0.7439</b> | <b>0.1683</b>      | <b>27.23</b> | <b>0.6876</b> | <b>0.2329</b>     | <b>25.99</b> | <b>0.6347</b> | <b>0.2976</b>     |  |  |
| Spatially-correlated |              |               | $\sigma = 40$     |              |               | $\sigma = 45$      |              |               | $\sigma = 50$     |              |               | $\sigma = 55$     |  |  |
| Method               | PSNR         | SSIM          | LPIPS             | PSNR         | SSIM          | LPIPS              | PSNR         | SSIM          | LPIPS             | PSNR         | SSIM          | LPIPS             |  |  |
| DnCNN [14]           | 29.92        | 0.8159        | 0.2221            | 28.59        | 0.7672        | 0.2718             | 27.35        | 0.7160        | 0.3197            | 26.23        | 0.6665        | 0.3654            |  |  |
| RIDNet [2]           | 29.36        | 0.7958        | 0.2608            | 28.06        | 0.7433        | 0.3146             | 26.90        | 0.6910        | 0.3624            | 25.85        | 0.6426        | 0.4056            |  |  |
| RNAN [16]            | 29.16        | 0.7792        | 0.2542            | 27.85        | 0.7257        | 0.3053             | 26.70        | 0.6751        | 0.3514            | 25.68        | 0.6286        | 0.3941            |  |  |
| SwinIR [10]          | 29.10        | 0.7710        | 0.2498            | 27.77        | 0.7165        | 0.3005             | 26.61        | 0.6658        | 0.3446            | 25.59        | 0.6193        | 0.3876            |  |  |
| Restormer [13]       | 24.46        | 0.6408        | 0.2867            | 23.90        | 0.6043        | 0.3217             | 23.48        | 0.5723        | 0.3542            | 23.18        | 0.5431        | 0.3874            |  |  |
| Dropout [8]          | 28.15        | 0.7946        | 0.2123            | 27.32        | 0.7542        | 0.2562             | 26.47        | 0.7097        | 0.3021            | 25.65        | 0.6649        | 0.3493            |  |  |
| baseline             | 29.43        | 0.7731        | 0.2365            | 28.05        | 0.7191        | 0.289              | 26.61        | 0.6532        | 0.3513            | 25.82        | 0.6223        | 0.3770            |  |  |
| <b>Ours</b>          | <b>28.96</b> | <b>0.7996</b> | <b>0.1952</b>     | <b>28.36</b> | <b>0.7779</b> | <b>0.2216</b>      | <b>27.65</b> | <b>0.7529</b> | <b>0.2507</b>     | <b>27.01</b> | <b>0.7251</b> | <b>0.2827</b>     |  |  |
| Salt & pepper        |              |               | $d = 0.002$       |              |               | $d = 0.004$        |              |               | $d = 0.008$       |              |               | $d = 0.012$       |  |  |
| Method               | PSNR         | SSIM          | LPIPS             | PSNR         | SSIM          | LPIPS              | PSNR         | SSIM          | LPIPS             | PSNR         | SSIM          | LPIPS             |  |  |
| DnCNN [14]           | 23.53        | 0.6675        | 0.3607            | 20.13        | 0.4878        | 0.5403             | 16.72        | 0.2966        | 0.7748            | 14.73        | 0.2057        | 0.9320            |  |  |
| RIDNet [2]           | 24.01        | 0.6639        | 0.3581            | 20.48        | 0.4864        | 0.5288             | 16.93        | 0.2960        | 0.7584            | 14.92        | 0.2065        | 0.9131            |  |  |
| RNAN [16]            | 22.62        | 0.6428        | 0.3731            | 19.54        | 0.4651        | 0.5374             | 16.43        | 0.2854        | 0.7626            | 14.59        | 0.2007        | 0.9193            |  |  |
| SwinIR [10]          | 22.68        | 0.6391        | 0.3580            | 19.50        | 0.4581        | 0.5226             | 16.32        | 0.2749        | 0.7379            | 14.47        | 0.1914        | 0.8889            |  |  |
| Restormer [13]       | 23.04        | 0.6398        | 0.3667            | 20.10        | 0.4829        | 0.5207             | 18.64        | 0.3555        | 0.6163            | 18.34        | 0.3156        | 0.6797            |  |  |
| Dropout [8]          | 25.83        | 0.6771        | 0.3082            | 23.04        | 0.5197        | 0.4693             | 19.89        | 0.3536        | 0.6918            | 17.96        | 0.2709        | 0.8487            |  |  |
| baseline             | 24.06        | 0.6224        | 0.3485            | 20.87        | 0.4630        | 0.5183             | 17.69        | 0.2959        | 0.7378            | 15.86        | 0.2156        | 0.8867            |  |  |
| <b>Ours</b>          | <b>29.51</b> | <b>0.7929</b> | <b>0.1504</b>     | <b>27.45</b> | <b>0.7117</b> | <b>0.2476</b>      | <b>24.03</b> | <b>0.5508</b> | <b>0.4350</b>     | <b>21.59</b> | <b>0.4313</b> | <b>0.5968</b>     |  |  |
| Mixture noise        |              |               | level 1           |              |               | level 2            |              |               | level 3           |              |               | level 4           |  |  |
| Method               | PSNR         | SSIM          | LPIPS             | PSNR         | SSIM          | LPIPS              | PSNR         | SSIM          | LPIPS             | PSNR         | SSIM          | LPIPS             |  |  |
| DnCNN [14]           | 28.41        | 0.7627        | 0.1869            | 26.88        | 0.6989        | 0.2406             | 24.16        | 0.5781        | 0.3564            | 22.33        | 0.4877        | 0.4447            |  |  |
| RIDNet [2]           | 28.38        | 0.7509        | 0.1781            | 26.65        | 0.6811        | 0.2337             | 23.82        | 0.5558        | 0.3479            | 22.03        | 0.4659        | 0.4335            |  |  |
| RNAN [16]            | 27.52        | 0.7285        | 0.1886            | 25.99        | 0.6616        | 0.2414             | 23.42        | 0.5412        | 0.3510            | 21.75        | 0.4533        | 0.4351            |  |  |
| SwinIR [10]          | 27.57        | 0.7271        | 0.1601            | 26.07        | 0.6619        | 0.2050             | 23.56        | 0.5453        | 0.3059            | 21.86        | 0.4557        | 0.3869            |  |  |
| Restormer [13]       | 28.59        | 0.7674        | 0.1410            | 27.53        | 0.7210        | 0.1703             | 25.29        | 0.6263        | 0.2462            | 23.71        | 0.5578        | 0.2991            |  |  |
| Dropout [8]          | 27.47        | 0.7515        | 0.1694            | 26.41        | 0.6924        | 0.2190             | 24.58        | 0.5856        | 0.3255            | 23.27        | 0.5086        | 0.4079            |  |  |
| baseline             | 28.05        | 0.7472        | 0.1665            | 26.40        | 0.6810        | 0.2148             | 23.70        | 0.5418        | 0.3229            | 21.91        | 0.4397        | 0.4061            |  |  |
| <b>Ours</b>          | <b>29.91</b> | <b>0.8267</b> | <b>0.1094</b>     | <b>29.44</b> | <b>0.8111</b> | <b>0.1312</b>      | <b>28.24</b> | <b>0.7570</b> | <b>0.1870</b>     | <b>27.15</b> | <b>0.7018</b> | <b>0.2452</b>     |  |  |

Table 3. Quantitative comparison on McMaster [15].

| Speckle noise        |              |               | $\sigma^2 = 0.02$ |              |               | $\sigma^2 = 0.024$ |              |               | $\sigma^2 = 0.03$ |              |               | $\sigma^2 = 0.04$ |  |  |
|----------------------|--------------|---------------|-------------------|--------------|---------------|--------------------|--------------|---------------|-------------------|--------------|---------------|-------------------|--|--|
| Method               | PSNR         | SSIM          | LPIPS             | PSNR         | SSIM          | LPIPS              | PSNR         | SSIM          | LPIPS             | PSNR         | SSIM          | LPIPS             |  |  |
| DnCNN [14]           | 29.90        | 0.8380        | 0.1699            | 28.57        | 0.8044        | 0.1982             | 26.90        | 0.7610        | 0.2374            | 24.84        | 0.7035        | 0.2996            |  |  |
| RIDNet [2]           | 30.11        | 0.8404        | 0.1597            | 28.75        | 0.8044        | 0.1884             | 27.03        | 0.7590        | 0.2305            | 24.87        | 0.6999        | 0.2927            |  |  |
| RNAN [16]            | 29.36        | 0.8228        | 0.1593            | 27.95        | 0.7883        | 0.1872             | 26.28        | 0.7451        | 0.2276            | 24.28        | 0.6870        | 0.2893            |  |  |
| SwinIR [10]          | 28.89        | 0.8101        | 0.1602            | 27.55        | 0.7774        | 0.1867             | 25.98        | 0.7362        | 0.2251            | 24.07        | 0.6810        | 0.2849            |  |  |
| Restormer [13]       | 29.16        | 0.8279        | 0.1518            | 28.13        | 0.8015        | 0.1742             | 26.84        | 0.7667        | 0.2049            | 25.17        | 0.7202        | 0.2523            |  |  |
| Dropout [8]          | 29.13        | 0.8447        | 0.1684            | 28.28        | 0.8171        | 0.1953             | 27.16        | 0.7804        | 0.2347            | 25.69        | 0.7311        | 0.2936            |  |  |
| baseline             | 29.11        | 0.8122        | 0.1794            | 27.75        | 0.7801        | 0.2077             | 26.15        | 0.7393        | 0.2465            | 24.19        | 0.6837        | 0.3050            |  |  |
| <b>Ours</b>          | <b>30.46</b> | <b>0.8777</b> | <b>0.1435</b>     | <b>30.08</b> | <b>0.8697</b> | <b>0.1511</b>      | <b>29.49</b> | <b>0.8502</b> | <b>0.1691</b>     | <b>28.53</b> | <b>0.8169</b> | <b>0.2060</b>     |  |  |
| Poisson noise        |              |               | $\alpha = 2$      |              |               | $\alpha = 2.5$     |              |               | $\alpha = 3$      |              |               | $\alpha = 3.5$    |  |  |
| Method               | PSNR         | SSIM          | LPIPS             | PSNR         | SSIM          | LPIPS              | PSNR         | SSIM          | LPIPS             | PSNR         | SSIM          | LPIPS             |  |  |
| DnCNN [14]           | 28.13        | 0.7790        | 0.1957            | 24.40        | 0.6417        | 0.3284             | 21.77        | 0.5295        | 0.4524            | 19.83        | 0.4446        | 0.5639            |  |  |
| RIDNet [2]           | 28.00        | 0.7705        | 0.1878            | 24.08        | 0.6199        | 0.3237             | 21.50        | 0.5082        | 0.4459            | 19.67        | 0.4279        | 0.5542            |  |  |
| RNAN [16]            | 27.38        | 0.7505        | 0.1902            | 23.73        | 0.6081        | 0.3201             | 21.29        | 0.5003        | 0.4405            | 19.51        | 0.4220        | 0.5498            |  |  |
| SwinIR [10]          | 27.12        | 0.7392        | 0.1849            | 23.69        | 0.6049        | 0.3094             | 21.27        | 0.4992        | 0.4282            | 19.46        | 0.4200        | 0.5393            |  |  |
| Restormer [13]       | 28.68        | 0.7973        | 0.1506            | 25.67        | 0.6951        | 0.2361             | 23.54        | 0.6167        | 0.3139            | 22.25        | 0.5598        | 0.3831            |  |  |
| Dropout [8]          | 28.03        | 0.7953        | 0.1975            | 25.42        | 0.6823        | 0.3220             | 23.45        | 0.5901        | 0.4366            | 21.94        | 0.5182        | 0.5418            |  |  |
| baseline             | 27.55        | 0.7517        | 0.2085            | 23.92        | 0.6173        | 0.3346             | 21.42        | 0.5087        | 0.4510            | 19.63        | 0.4259        | 0.5572            |  |  |
| <b>Ours</b>          | <b>30.01</b> | <b>0.8656</b> | <b>0.1390</b>     | <b>28.48</b> | <b>0.8053</b> | <b>0.2072</b>      | <b>26.84</b> | <b>0.7318</b> | <b>0.2974</b>     | <b>25.33</b> | <b>0.6616</b> | <b>0.3937</b>     |  |  |
| Spatially-correlated |              |               | $\sigma = 40$     |              |               | $\sigma = 45$      |              |               | $\sigma = 50$     |              |               | $\sigma = 55$     |  |  |
| Method               | PSNR         | SSIM          | LPIPS             | PSNR         | SSIM          | LPIPS              | PSNR         | SSIM          | LPIPS             | PSNR         | SSIM          | LPIPS             |  |  |
| DnCNN [14]           | 29.38        | 0.8304        | 0.2819            | 28.02        | 0.7839        | 0.3379             | 26.78        | 0.7349        | 0.3864            | 25.68        | 0.6880        | 0.4290            |  |  |
| RIDNet [2]           | 28.74        | 0.8092        | 0.3306            | 27.45        | 0.7603        | 0.3865             | 26.32        | 0.7122        | 0.4300            | 25.31        | 0.6670        | 0.4672            |  |  |
| RNAN [16]            | 28.68        | 0.7983        | 0.3192            | 27.39        | 0.7499        | 0.3703             | 26.25        | 0.7029        | 0.4122            | 25.25        | 0.6591        | 0.4500            |  |  |
| SwinIR [10]          | 28.56        | 0.7883        | 0.3353            | 27.26        | 0.7389        | 0.3853             | 26.13        | 0.6918        | 0.4298            | 25.13        | 0.6484        | 0.4664            |  |  |
| Restormer [13]       | 24.54        | 0.7076        | 0.3661            | 24.17        | 0.6689        | 0.4007             | 23.70        | 0.6320        | 0.4348            | 23.35        | 0.5978        | 0.4640            |  |  |
| Dropout [8]          | 28.89        | 0.8383        | 0.2580            | 27.89        | 0.7999        | 0.3109             | 26.90        | 0.7563        | 0.3656            | 25.96        | 0.7123        | 0.4135            |  |  |
| baseline             | 29.11        | 0.8109        | 0.3071            | 27.69        | 0.7578        | 0.3658             | 26.48        | 0.7078        | 0.4147            | 25.42        | 0.6625        | 0.4537            |  |  |
| <b>Ours</b>          | <b>29.08</b> | <b>0.8445</b> | <b>0.2431</b>     | <b>28.43</b> | <b>0.8242</b> | <b>0.2765</b>      | <b>27.71</b> | <b>0.7985</b> | <b>0.3127</b>     | <b>27.03</b> | <b>0.7719</b> | <b>0.3476</b>     |  |  |
| Salt & pepper        |              |               | $d = 0.002$       |              |               | $d = 0.004$        |              |               | $d = 0.008$       |              |               | $d = 0.012$       |  |  |
| Method               | PSNR         | SSIM          | LPIPS             | PSNR         | SSIM          | LPIPS              | PSNR         | SSIM          | LPIPS             | PSNR         | SSIM          | LPIPS             |  |  |
| DnCNN [14]           | 24.39        | 0.7102        | 0.3205            | 20.88        | 0.5423        | 0.5032             | 17.33        | 0.3499        | 0.7615            | 15.27        | 0.2510        | 0.9304            |  |  |
| RIDNet [2]           | 24.83        | 0.7065        | 0.3165            | 21.12        | 0.5400        | 0.4912             | 17.44        | 0.3470        | 0.7459            | 15.41        | 0.2510        | 0.9096            |  |  |
| RNAN [16]            | 23.32        | 0.6768        | 0.3312            | 20.19        | 0.5127        | 0.4970             | 16.99        | 0.3343        | 0.7464            | 15.12        | 0.2443        | 0.9133            |  |  |
| SwinIR [10]          | 23.21        | 0.6724        | 0.3416            | 20.04        | 0.5035        | 0.5123             | 16.84        | 0.3206        | 0.7541            | 14.97        | 0.2320        | 0.9190            |  |  |
| Restormer [13]       | 23.58        | 0.6779        | 0.3429            | 20.77        | 0.5292        | 0.5016             | 19.13        | 0.4143        | 0.6322            | 18.37        | 0.3500        | 0.7409            |  |  |
| Dropout [8]          | 26.92        | 0.7433        | 0.2739            | 23.97        | 0.5999        | 0.4380             | 20.70        | 0.4330        | 0.6832            | 18.75        | 0.3431        | 0.8508            |  |  |
| baseline             | 25.09        | 0.6879        | 0.3289            | 21.71        | 0.5261        | 0.5088             | 18.25        | 0.3480        | 0.7621            | 16.30        | 0.2594        | 0.9216            |  |  |
| <b>Ours</b>          | <b>29.96</b> | <b>0.8558</b> | <b>0.1512</b>     | <b>28.01</b> | <b>0.7893</b> | <b>0.2295</b>      | <b>24.69</b> | <b>0.6391</b> | <b>0.4408</b>     | <b>22.23</b> | <b>0.5174</b> | <b>0.6331</b>     |  |  |
| Mixture noise        |              |               | level 1           |              |               | level 2            |              |               | level 3           |              |               | level 4           |  |  |
| Method               | PSNR         | SSIM          | LPIPS             | PSNR         | SSIM          | LPIPS              | PSNR         | SSIM          | LPIPS             | PSNR         | SSIM          | LPIPS             |  |  |
| DnCNN [14]           | 27.91        | 0.7876        | 0.1955            | 26.28        | 0.7151        | 0.2561             | 23.52        | 0.5791        | 0.3825            | 21.70        | 0.4867        | 0.4833            |  |  |
| RIDNet [2]           | 27.80        | 0.7740        | 0.1888            | 25.97        | 0.6885        | 0.2510             | 23.14        | 0.5463        | 0.3777            | 21.38        | 0.4589        | 0.4752            |  |  |
| RNAN [16]            | 27.16        | 0.7543        | 0.1946            | 25.52        | 0.6718        | 0.2515             | 22.89        | 0.5366        | 0.3711            | 21.22        | 0.4532        | 0.4683            |  |  |
| SwinIR [10]          | 27.10        | 0.7477        | 0.1827            | 25.51        | 0.6668        | 0.2378             | 22.96        | 0.5363        | 0.3563            | 21.29        | 0.4523        | 0.4533            |  |  |
| Restormer [13]       | 28.54        | 0.8091        | 0.1493            | 27.50        | 0.7625        | 0.1796             | 25.17        | 0.6509        | 0.2599            | 23.52        | 0.5729        | 0.3270            |  |  |
| Dropout [8]          | 28.01        | 0.8076        | 0.1841            | 26.78        | 0.7455        | 0.2455             | 24.70        | 0.6296        | 0.3722            | 23.29        | 0.5532        | 0.4672            |  |  |
| baseline             | 27.81        | 0.7717        | 0.2022            | 26.06        | 0.6916        | 0.2659             | 23.27        | 0.5476        | 0.3927            | 21.48        | 0.4563        | 0.4886            |  |  |
| <b>Ours</b>          | <b>29.74</b> | <b>0.8672</b> | <b>0.1342</b>     | <b>29.14</b> | <b>0.8466</b> | <b>0.1551</b>      | <b>27.80</b> | <b>0.7900</b> | <b>0.2231</b>     | <b>26.62</b> | <b>0.7305</b> | <b>0.2964</b>     |  |  |

Table 4. Quantitative comparison on CBSD68 [11].



| Speckle noise        |                   |               |               |                    |               |               |                   |               |               |                   |               |               |
|----------------------|-------------------|---------------|---------------|--------------------|---------------|---------------|-------------------|---------------|---------------|-------------------|---------------|---------------|
| Method               | $\sigma^2 = 0.02$ |               |               | $\sigma^2 = 0.024$ |               |               | $\sigma^2 = 0.03$ |               |               | $\sigma^2 = 0.04$ |               |               |
|                      | PSNR              | SSIM          | LPIPS         | PSNR               | SSIM          | LPIPS         | PSNR              | SSIM          | LPIPS         | PSNR              | SSIM          | LPIPS         |
| DnCNN [14]           | 28.66             | 0.8207        | 0.1456        | 27.28              | 0.7880        | 0.1745        | 25.64             | 0.7478        | 0.2138        | 23.67             | 0.6962        | 0.2716        |
| RIDNet [2]           | 28.73             | 0.8218        | 0.1386        | 27.31              | 0.7874        | 0.1683        | 25.63             | 0.7457        | 0.2086        | 23.63             | 0.6933        | 0.2662        |
| RNAN [16]            | 27.99             | 0.8047        | 0.1414        | 26.60              | 0.7726        | 0.1697        | 25.01             | 0.7333        | 0.2085        | 23.14             | 0.6826        | 0.2652        |
| SwinIR [10]          | 27.50             | 0.7931        | 0.1408        | 26.19              | 0.7626        | 0.1683        | 24.68             | 0.7256        | 0.2059        | 22.88             | 0.6772        | 0.2609        |
| Restormer [13]       | 28.22             | 0.8100        | 0.1370        | 27.17              | 0.7851        | 0.1578        | 25.86             | 0.7529        | 0.1874        | 24.15             | 0.7106        | 0.2302        |
| Dropout [8]          | 27.69             | 0.8258        | 0.1516        | 26.83              | 0.7981        | 0.1797        | 25.78             | 0.7639        | 0.2167        | 24.42             | 0.7200        | 0.2693        |
| baseline             | 27.66             | 0.7916        | 0.1611        | 26.33              | 0.7617        | 0.1877        | 24.80             | 0.7242        | 0.2241        | 22.98             | 0.6753        | 0.2772        |
| <b>Ours</b>          | <b>28.97</b>      | <b>0.8771</b> | <b>0.1062</b> | <b>28.60</b>       | <b>0.8642</b> | <b>0.1180</b> | <b>28.04</b>      | <b>0.8421</b> | <b>0.1421</b> | <b>27.12</b>      | <b>0.8055</b> | <b>0.1832</b> |
| Poisson noise        |                   |               |               |                    |               |               |                   |               |               |                   |               |               |
| Method               | $\alpha = 2$      |               |               | $\alpha = 2.5$     |               |               | $\alpha = 3$      |               |               | $\alpha = 3.5$    |               |               |
|                      | PSNR              | SSIM          | LPIPS         | PSNR               | SSIM          | LPIPS         | PSNR              | SSIM          | LPIPS         | PSNR              | SSIM          | LPIPS         |
| DnCNN [14]           | 27.72             | 0.7814        | 0.1656        | 24.06              | 0.6682        | 0.2738        | 21.52             | 0.5807        | 0.3740        | 19.65             | 0.5128        | 0.4638        |
| RIDNet [2]           | 27.51             | 0.7728        | 0.1600        | 23.75              | 0.6536        | 0.2697        | 21.27             | 0.5675        | 0.3686        | 19.51             | 0.5025        | 0.4561        |
| RNAN [16]            | 26.88             | 0.7550        | 0.1634        | 23.37              | 0.6428        | 0.2682        | 21.02             | 0.5593        | 0.3662        | 19.30             | 0.4953        | 0.4544        |
| SwinIR [10]          | 26.59             | 0.7451        | 0.1586        | 23.27              | 0.6392        | 0.2575        | 20.95             | 0.5575        | 0.3533        | 19.21             | 0.4929        | 0.4426        |
| Restormer [13]       | 28.39             | 0.7964        | 0.1326        | 25.34              | 0.7049        | 0.2043        | 22.89             | 0.6266        | 0.2802        | 21.25             | 0.5684        | 0.3524        |
| Dropout [8]          | 27.19             | 0.7928        | 0.1722        | 24.82              | 0.6989        | 0.2706        | 22.98             | 0.6269        | 0.3607        | 21.55             | 0.5698        | 0.4437        |
| baseline             | 26.94             | 0.7511        | 0.1790        | 23.45              | 0.6425        | 0.2788        | 21.09             | 0.5593        | 0.3712        | 19.40             | 0.4936        | 0.4556        |
| <b>Ours</b>          | <b>28.72</b>      | <b>0.8710</b> | <b>0.1051</b> | <b>27.48</b>       | <b>0.8142</b> | <b>0.1668</b> | <b>26.04</b>      | <b>0.7446</b> | <b>0.2464</b> | <b>24.71</b>      | <b>0.6845</b> | <b>0.3232</b> |
| Spatially-correlated |                   |               |               |                    |               |               |                   |               |               |                   |               |               |
| Method               | $\sigma = 40$     |               |               | $\sigma = 45$      |               |               | $\sigma = 50$     |               |               | $\sigma = 55$     |               |               |
|                      | PSNR              | SSIM          | LPIPS         | PSNR               | SSIM          | LPIPS         | PSNR              | SSIM          | LPIPS         | PSNR              | SSIM          | LPIPS         |
| DnCNN [14]           | 29.87             | 0.8526        | 0.1912        | 28.50              | 0.8110        | 0.2371        | 27.23             | 0.7677        | 0.2795        | 26.09             | 0.7258        | 0.3173        |
| RIDNet [2]           | 29.24             | 0.8364        | 0.2216        | 27.89              | 0.7908        | 0.2702        | 26.68             | 0.7464        | 0.3116        | 25.62             | 0.7051        | 0.3464        |
| RNAN [16]            | 29.07             | 0.8203        | 0.2248        | 27.72              | 0.7767        | 0.2674        | 26.54             | 0.7351        | 0.3052        | 25.50             | 0.6961        | 0.3385        |
| SwinIR [10]          | 28.99             | 0.8116        | 0.2360        | 27.64              | 0.7678        | 0.2769        | 26.46             | 0.7265        | 0.3131        | 25.43             | 0.6882        | 0.3455        |
| Restormer [13]       | 26.38             | 0.7360        | 0.2593        | 25.56              | 0.7011        | 0.2902        | 24.77             | 0.6686        | 0.3189        | 24.06             | 0.6384        | 0.3455        |
| Dropout [8]          | 28.68             | 0.8529        | 0.1797        | 27.78              | 0.8191        | 0.2204        | 26.86             | 0.7808        | 0.2635        | 25.96             | 0.7411        | 0.3046        |
| baseline             | 29.58             | 0.8440        | 0.2092        | 28.11              | 0.7950        | 0.2567        | 26.84             | 0.7492        | 0.2974        | 25.74             | 0.7076        | 0.3323        |
| <b>Ours</b>          | <b>28.06</b>      | <b>0.8586</b> | <b>0.1720</b> | <b>27.55</b>       | <b>0.8410</b> | <b>0.1976</b> | <b>26.98</b>      | <b>0.8196</b> | <b>0.2266</b> | <b>26.40</b>      | <b>0.7951</b> | <b>0.2562</b> |
| Salt & pepper        |                   |               |               |                    |               |               |                   |               |               |                   |               |               |
| Method               | $d = 0.002$       |               |               | $d = 0.004$        |               |               | $d = 0.008$       |               |               | $d = 0.012$       |               |               |
|                      | PSNR              | SSIM          | LPIPS         | PSNR               | SSIM          | LPIPS         | PSNR              | SSIM          | LPIPS         | PSNR              | SSIM          | LPIPS         |
| DnCNN [14]           | 24.01             | 0.7372        | 0.2643        | 20.55              | 0.5828        | 0.4143        | 17.05             | 0.4029        | 0.6335        | 15.01             | 0.3062        | 0.7973        |
| RIDNet [2]           | 24.56             | 0.7372        | 0.2613        | 20.88              | 0.5835        | 0.4062        | 17.20             | 0.4023        | 0.6220        | 15.16             | 0.3072        | 0.7824        |
| RNAN [16]            | 23.01             | 0.7132        | 0.2744        | 19.87              | 0.5582        | 0.4137        | 16.71             | 0.3892        | 0.6223        | 14.86             | 0.2999        | 0.7840        |
| SwinIR [10]          | 22.90             | 0.7075        | 0.2823        | 19.74              | 0.5507        | 0.4215        | 16.56             | 0.3790        | 0.6231        | 14.71             | 0.2910        | 0.7773        |
| Restormer [13]       | 23.42             | 0.7145        | 0.2799        | 20.53              | 0.5772        | 0.4086        | 18.65             | 0.4571        | 0.5308        | 17.81             | 0.3967        | 0.6311        |
| Dropout [8]          | 26.33             | 0.7591        | 0.2326        | 23.48              | 0.6279        | 0.3647        | 20.29             | 0.4781        | 0.5635        | 18.35             | 0.3943        | 0.7181        |
| baseline             | 24.92             | 0.7224        | 0.2667        | 21.56              | 0.5752        | 0.4130        | 18.11             | 0.4103        | 0.6263        | 16.15             | 0.3225        | 0.7840        |
| <b>Ours</b>          | <b>28.58</b>      | <b>0.8655</b> | <b>0.1158</b> | <b>26.93</b>       | <b>0.8074</b> | <b>0.1850</b> | <b>24.01</b>      | <b>0.6780</b> | <b>0.3530</b> | <b>21.75</b>      | <b>0.5652</b> | <b>0.5140</b> |
| Mixture noise        |                   |               |               |                    |               |               |                   |               |               |                   |               |               |
| Method               | level 1           |               |               | level 2            |               |               | level 3           |               |               | level 4           |               |               |
|                      | PSNR              | SSIM          | LPIPS         | PSNR               | SSIM          | LPIPS         | PSNR              | SSIM          | LPIPS         | PSNR              | SSIM          | LPIPS         |
| DnCNN [14]           | 27.62             | 0.7842        | 0.1656        | 26.08              | 0.7221        | 0.2120        | 23.41             | 0.6112        | 0.3116        | 21.64             | 0.5332        | 0.3907        |
| RIDNet [2]           | 27.51             | 0.7725        | 0.1592        | 25.75              | 0.7011        | 0.2076        | 23.01             | 0.5844        | 0.3080        | 21.31             | 0.5099        | 0.3851        |
| RNAN [16]            | 26.85             | 0.7535        | 0.1651        | 25.28              | 0.6866        | 0.2092        | 22.75             | 0.5759        | 0.3046        | 21.13             | 0.5041        | 0.3813        |
| SwinIR [10]          | 26.79             | 0.7475        | 0.1566        | 25.26              | 0.6816        | 0.1973        | 22.81             | 0.5751        | 0.2878        | 21.19             | 0.5040        | 0.3634        |
| Restormer [13]       | 28.45             | 0.8085        | 0.1269        | 27.39              | 0.7665        | 0.1517        | 25.03             | 0.6716        | 0.2171        | 23.26             | 0.5984        | 0.2749        |
| Dropout [8]          | 27.22             | 0.7976        | 0.1608        | 26.11              | 0.7431        | 0.2077        | 24.22             | 0.6484        | 0.3035        | 22.91             | 0.5849        | 0.3770        |
| baseline             | 27.47             | 0.7795        | 0.1718        | 25.79              | 0.7136        | 0.2191        | 23.12             | 0.5931        | 0.3170        | 21.38             | 0.5131        | 0.3925        |
| <b>Ours</b>          | <b>28.57</b>      | <b>0.8749</b> | <b>0.0995</b> | <b>28.08</b>       | <b>0.8566</b> | <b>0.1186</b> | <b>26.97</b>      | <b>0.8053</b> | <b>0.1747</b> | <b>25.97</b>      | <b>0.7516</b> | <b>0.2337</b> |

Table 5. Quantitative comparison on Urban100 [7].
